# Supplementary material for: Comprehensive Glycomics of a Multistep Human Brain Tumor Model Reveals Specific Glycosylation Patterns Related to Malignancy
Source: PLoS One. 2015 Jul 1;10(7):e0128300. doi: 10.1371/journal.pone.0128300 (PMC4488535; doi:10.1371/journal.pone.0128300)
Supplement: S4 Table — (XLSX) [file pone.0128300.s018.xlsx]

## Sheet: Table S4
			reducing end : hemiacetal derivertized with aoWR tag.
			All signals were detected as protone adducts [M+H]+ in positive ion mode.	Hex	HexNAc	Fuc	Neu5Ac	Neu5Gc	lactone	Ac	WR+H
	TSR			162.053	203.079	146.058	305.115	321.11	32.0262	42.0105	448.231
	Class	No	Composition									Theor. m/z	Obsd. m/z			Tolerance			AVE	SD	CV	m/z characteristic fragment ions for the structural determinatin of glycan isomers (compositions)	Enzymatic digestion for the structural determinatin of glycan isomers
													N=1	N=1	N=3	N=1	N=1	N=3
1	LacCer	GSL-1	(Hex)2	2								772.336	772.475	772.474	772.468	0.138834	0.137388	0.131303	#REF!	#REF!	#REF!
2	Gg	GSL-2	(Hex)2(Neu5Ac)1 [GM3]	2			1					1077.45	1077.7	1077.7	1077.68	0.252654	0.243493	0.223524	#REF!	#REF!	#REF!
3	Gg	GSL-3	(Hex)2(Neu5Ac)1(lacton) [GM3(lactoner)]	2			1		1			1045.43	1045.66	1045.65	1045.63	0.229893	0.222323	0.206034	#REF!	#REF!	#REF!
4	Gg	GSL-4	(Hex)2(Neu5Gc)1 [GM3(Neu5Gc)]	2				1				1093.45	1093.71	1093.69	1093.67	0.262717	0.246818	0.219278	#REF!	#REF!	#REF!
5	Gg	GSL-5	(Hex)2(HexNAc)1(Neu5Ac)1 [GM2]	2	1		1					1280.53	1280.84	1280.83	1280.8	0.311666	0.297421	0.271067	#REF!	#REF!	#REF!
6	Gg	GSL-6	(Hex)2(HexNAc)1(Neu5Gc)1 [GM2(Neu5Gc)]	2	1			1				1296.53	N.D.	N.D.	N.D.	-	-	-	-	-	-
7	Gg	GSL-7	(Hex)2(Neu5Ac)2 [GD3]	2			2					1382.57	1382.88	1382.87	1382.83	0.313942	0.302197	0.261732	#REF!	#REF!	#REF!
8	Gg	GSL-8	(Hex)2(Neu5Ac)2(lactone) [GD3(lactone)]	2			2		1			1350.54	1350.86	1350.87	1350.82	0.321894	0.324494	0.275374	#REF!	#REF!	#REF!
9	Gg	GSL-9 1)	(Hex)3(HexNAc)1(Neu5Ac)1 [GM1]	3	1		1					1442.58	1442.93	1442.93	1442.89	0.344786	0.342326	0.304493	#REF!	#REF!	#REF!		*β1-3,6galactosidase
10	Gg	GSL-10 2)	(Hex)3(HexNAc)1(Neu5Gc)1 [GM1{Neu5Gc)]	3	1			1				1458.58	1458.94	1458.93	1458.89	0.360168	0.3494	0.30824	#REF!	#REF!	#REF!		*β1-3,6galactosidase
11	Gg	GSL-11	(Hex)3(HexNAc)1(Neu5Ac)2 [GD1]	3	1		2					1747.7	1748.12	1748.11	1748.06	0.421084	0.411576	0.365212	#REF!	#REF!	#REF!
12	Gg	GSL-12	(Hex)3(HexNAc)1(Neu5Ac)2(lactone) [GD1(lactone)]	3	1		2		1			1715.67	1716.09	1716.07	1716.02	0.417026	0.396231	0.349254	#REF!	#REF!	#REF!
13	Gg	GSL-13	(Hex)3(HexNAc)1(Neu5Ac)1(Neu5Gc)1 [GD1(Neu5Gc)]	3	1		1	1				1763.69	1764.12	1764.12	1764.07	0.42345	0.428929	0.374927	#REF!	#REF!	#REF!
14	Gg	GSL-14	(Hex)3(HexNAc)1(Neu5Gc)2 [GD1(Neu5Gc x 2)]	3	1			2				1779.69	N.D.	1780.07	1780.04	-	0.381249	0.347109	#REF!	#REF!	#REF!
15	Gg	GSL-15	(Hex)3(HexNAc)2(NeuAc)2 [GalNAc-GD1]	3	2		2					1950.78	1951.22	1951.23	1951.16	0.438342	0.455229	0.385769	#REF!	#REF!	#REF!
16	Gb	GSL-16	(Hex)3 [Gb3]	3								934.389	934.593	934.592	934.578	0.203481	0.203083	0.188625	#REF!	#REF!	#REF!
17	Gb	GSL-17 3)	(Hex)3(HexNAc)1 [Gb4]	3	1							1137.47	1137.74	1137.73	1137.71	0.268629	0.265556	0.242915	#REF!	#REF!	#REF!	m/z 934, ((Hex)3-aoWR)
18	Gb	GSL-18 4)	(Hex)4(HexNAc)1 [Gb5(SSEA-3)]	4	1							1299.52	1299.84	1299.83	1299.8	0.319792	0.312045	0.2809	#REF!	#REF!	#REF!	m/z 934, ((Hex)3-aoWR)
19	Gb	GSL-19	(Hex)4(HexNAc)1(Neu5Ac)1 [SSEA-4]	4	1		1					1604.64	1605.03	1605.01	1604.96	0.393641	0.368818	0.32687	#REF!	#REF!	#REF!
20	Gb	GSL-20 5)	(Hex)5(HexNAc)2	5	2							1664.65	1665.07	1665.06	1665.01	0.419508	0.40571	0.352554	#REF!	#REF!	#REF!	m/z 934, ((Hex)3-aoWR)
21	Lc	GSL-21	(Hex)3(HexNAc)1(Fuc)1 [Fuc-(n)Lc4 (SSEA-1 or SSEA-5)]	3	1	1						1283.53	1283.84	1283.83	1283.79	0.313347	0.303748	0.267219	#REF!	#REF!	#REF!
22	Lc	GSL-22 1)	(Hex)3(HexNAc)1(Neu5Ac)1 [Sialyl-(n)Lc4]	3	1		1					1442.58	1442.93	1442.93	1442.89	0.344786	0.342326	0.304493	#REF!	#REF!	#REF!		*β1-3,6galactosidase
23	Lc	GSL-23 2)	(Hex)3(HexNAc)1(Neu5Gc)1 [Sialyl-(n)Lc4 (Neu5Gc)]	3	1			1				1458.58	1458.94	1458.93	1458.89	0.360168	0.3494	0.30824	#REF!	#REF!	#REF!		*β1-3,6galactosidase
24	Lc	GSL-24 4)	(Hex)4(HexNAc)1 [Gal-(n)Lc4]	4	1							1299.52	1299.84	1299.83	1299.8	0.319792	0.312045	0.2809	#REF!	#REF!	#REF!	m/z 975, ((HexNAc)1(Hex)2-aoWR)
25	Lc	GSL-25	(Hex)3(HexNAc)2 [(n)Lc5]	3	2							1340.55	1340.87	1340.87	1340.82	0.322984	0.317716	0.269284	#REF!	#REF!	#REF!
26	Lc	GSL-26	(Hex)3(HexNAc)2(Fuc)1 [Fuc-(n)Lc5 (type I A)]	3	2	1						1486.61	1486.94	1486.93	1486.9	0.333879	0.325528	0.297734	#REF!	#REF!	#REF!
27	Lc	GSL-27	(Hex)4(HexNAc)2(Neu5Ac)1	4	2		1					1807.72	1808.16	1808.15	1808.1	0.448576	0.432953	0.381346	#REF!	#REF!	#REF!
28	Lc	GSL-28	(Hex)4(HexNAc)3	4	3							1705.68	N.D.	1706.05	1705.99	-	0.37177	0.309377	#REF!	#REF!	#REF!
29	Lc	GSL-29	(Hex)4(HexNAc)3(Fuc)1	4	3	1						1851.74	N.D.	N.D.	N.D.	-	-	-	-	-	-
30	Lc	GSL-30 5)	(Hex)5(HexNAc)2	5	2							1664.65	1665.07	1665.06	1665.01	0.419508	0.40571	0.352554	#REF!	#REF!	#REF!	m/z 975, ((HexNAc)1(Hex)2-aoWR)
31	Lc	GSL-31	(Hex)5(HexNAc)3	5	3							1867.73	1868.18	1868.15	1868.11	0.450039	0.419355	0.37805	#REF!	#REF!	#REF!
32	Lc	GSL-32	(Hex)4(HexNAc)3(Neu5Ac)1	4	3		1					2010.8	2011.25	2011.26	2011.21	0.451819	0.461848	0.417211	#REF!	#REF!	#REF!
33	Lc	GSL-33	(Hex)5(HexNAc)3(Fuc)1	5	3	1						2013.79	N.D.	N.D.	N.D.	-	-	-	-	-	-
34	Lc	GSL-34	(Hex)6(HexNAc)3	6	3							2029.79	N.D.	2030.22	2030.18	-	0.431772	0.389938	#REF!	#REF!	#REF!
35	Lc	GSL-35	(Hex)5(HexNAc)3(Fuc)2	5	3	2						2159.85	N.D.	N.D.	N.D.	-	-	-	-	-	-
36	Lc	GSL-36	(Hex)5(HexNAc)3(Neu5Ac)1	5	3		1					2172.85	N.D.	N.D.	N.D.	-	-	-	-	-	-
37	Lc	GSL-37	(Hex)6(HexNAc)4	6	4							2232.87	N.D.	N.D.	N.D.	-	-	-	-	-	-
38	Lc	GSL-38	(Hex)5(HexNAc)3(Fuc)1(Neu5Ac)1	5	3	1	1					2318.91	N.D.	N.D.	N.D.	-	-	-	-	-	-
39	Lc	GSL-39	(Hex)5(HexNAc)3(Neu5Ac)2(lactone)	5	3		2		1			2445.94	N.D.	N.D.	N.D.	-	-	-	-	-	-
40	Gg or Lc	GSL-40	(Hex)2(HexNAc)1 [asialo GM2 or (n)Lc3]	2	1							975.416	975.647	975.637	975.621	0.230806	0.221541	0.205081	#REF!	#REF!	#REF!
41	Gg or Lc	GSL-41	(Hex)2(HexNAc)2	2	2							1178.5	N.D.	1178.77	N.D.	-	0.278018	-	#REF!	#REF!	#REF!
42	Gg or Lc	GSL-42 3)	(Hex)3(HexNAc)1 [asialo GM1 or (n)Lc4]	3	1							1137.47	1137.74	1137.73	1137.71	0.268629	0.265556	0.242915	#REF!	#REF!	#REF!	m/z 975, ((HexNAc)1(Hex)2-aoWR)
43	Gg or Lc	GSL-43	(Hex)3(HexNAc)1(Fuc)1(Neu5Ac)1	3	1	1	1					1588.64	1588.98	1588.99	1588.98	0.339465	0.352293	0.334506	#REF!	#REF!	#REF!
44	Gg or Lc	GSL-44	(Hex)3(HexNAc)1(Neu5Ac)1(lactone)	3	1		1		1			1410.56	1410.9	1410.89	1410.85	0.339732	0.329088	0.29374	#REF!	#REF!	#REF!
45	Gg or Lc	GSL-45	(Hex)3(HexNAc)2(Neu5Ac)1 [GalNAc-GM1,Sia-(n)Lc5, etc]	3	2		1					1645.66	1646.06	1646.06	1646	0.397778	0.391853	0.340196	#REF!	#REF!	#REF!
46	Gb or Lc	GSL-46	(Hex)4(HexNAc)2 [GlcNAc-Gb5, (n)Lc6 etc.]	4	2							1502.6	1502.97	1502.96	1502.91	0.370989	0.362514	0.313051	#REF!	#REF!	#REF!
47	Gb orLc	GSL-47	(Hex)4(HexNAc)2(Fuc)1 [Type IV A, type II H antigens etc.]	4	2	1						1648.66	1649.07	1649.05	1649.01	0.413667	0.392123	0.347194	#REF!	#REF!	#REF!
			Total number of peaks (mass range 750-2500)										113	169	140
			Number of assigned masses										30	34	33
			(%)										26.5487	20.1183	23.5714
													TSR1	TSR2	TSR3
												pmol/100ug	0.368603	0.329052	0.327962
												1664 Gb(934)pmol/100ug	0.159995	0.142827	0.142354
												1664nLc(975)pmol/100ug	0.208608	0.186225	0.185608
												1442	TSR	TSR	TSR	TSR	TSR
												SPG/SLc4/GM1	6.98193	6.23539	5.77827	0.3867	0.332505
												Gg=GM1	2.8207	2.5191	2.33442	0.156227	0.134332
												nLc=SLc4	4.16123	3.71629	3.44385	0.230473	0.198173
		1) Relative proportion of GSL-9 and GSL-22 was calculated by the effect of β1-3,6 galactose digestion.
		2) Relative proportion of GSL-10 and GSL-23 was calculated by the effect of β1-3,6 galactose digestion.
		3) Relative proportion of GSL-17 and GSL-42 was calculated from the area of the signitures fragmentation peaks (m/z 934 and 975).
		4) Relative proportion of GSL-18 and GSL-24 was calculated from the area of the signitures fragmentation peaks (m/z 934 and 975).
		5) Relative proportion of GSL-20 and GSL-30 was calculated from the area of the signitures fragmentation peaks (m/z 934 and 975).
