# Supplementary material for: Comprehensive Glycomics of a Multistep Human Brain Tumor Model Reveals Specific Glycosylation Patterns Related to Malignancy
Source: PLoS One. 2015 Jul 1;10(7):e0128300. doi: 10.1371/journal.pone.0128300 (PMC4488535; doi:10.1371/journal.pone.0128300)
Supplement: S13 Table — (XLSX) [file pone.0128300.s027.xlsx]

## Sheet: S13_Table
	S13 Table List of O-glycans detected in NHA/TS
			reducing end : hemiacetal derivertized with aoWR tag.
			All signals were detected as protone adducts [M+H]+ in positive ion mode.
	TS
	Class	No	Composition	Theor. m/z	Obsd. m/z		Tolerance		AVE	m/z characteristic fragment ions for the structural determinatin of glycan isomers (compositions)	Enzymatic digestion for the structural determinatin of glycan isomers
					N=1	N=1	N=1	N=1
	Core1	O-1	(Hex)1 (HexNAc)1 [T]	714.299	714.432	714.433	0.133833	0.13436	#REF!	m/z 552, ((HexNAc)1-bisPMP)
	Core3	O-2	(HexNAc)2	755.325	N.D.	N.D.	-	-	#REF!
	STn	O-3	(HexNAc)1 (NeuAc)1 [sialyl-Tn]	843.345	843.519	843.533	0.173422	0.187675	#REF!
	Core1 or Core2	O-4	(Hex)1 (HexNAc)2	917.378	917.613	917.588	0.235144	0.20963	#REF!
	Core1	O-5	(Hex)1 (HexNAc)1 (NeuAc)1 [sialyl-T]	1005.4	1005.64	1005.63	0.237009	0.227872	#REF!	m/z 714, ((Hex)1(HexNAc)1-bisPMP), m/z 552, ((HexNAc)1-bisPMP)
	Core1	O-6	(Hex)1 (HexNAc)1 (NeuGc)1 [sialyl-T (Gc)]	1021.39	1021.63	1021.62	0.239152	0.225574	#REF!
	Core1 or Core2	O-7	(Hex)2 (HexNAc)2	1079.43	1079.7	1079.69	0.273076	0.254391	#REF!
	Core1 or Core2	O-8	(Hex)1 (HexNAc)2 (NeuAc)1	1208.48	1208.75	1208.76	0.277174	0.282902	#REF!
	Core1	O-9	(Hex)1 (HexNAc)1 (NeuAc)2 [disialyl-T]	1296.5	1296.78	1296.78	0.279529	0.28266	#REF!	m/z 1005, ((Neu5Ac)1(Hex)1(HexNAc)1-bisPMP), m/z 714, ((Hex)1(HexNAc)1-bisPMP), m/z 552, ((HexNAc)1-bisPMP)
	Core1	O-10	(Hex)1 (HexNAc)1 (NeuAc)1 (NeuGc)1 [disialyl-T (Gc)]	1312.49	N.D.	N.D.	-	-	#REF!
	Core2	O-11	(Hex)2 (HexNAc)2 (NeuAc)1	1370.53	1370.83	1370.82	0.298393	0.289936	#REF!		*β1-3 and β1-4 galactosidase
	Core1 or Core2	O-12	(Hex)2 (HexNAc)2 (NeuAc)2	1661.63	1661.95	1661.96	0.319884	0.325986	#REF!
